# Supplementary material for: UVA/Vis-induced nitrous acid formation on polyphenolic films exposed to gaseous NO2
Source: Royal Society of Chemistry journal article supplement (doi:10.1039/c1pp05113j), 2011-08-03
Supplement: c1pp05113j.pdf [file c1pp05113j.pdf]

# UVA/Vis induced nitrous acid formation on polyphenolic films exposed to gaseous NO<sub>2</sub>

## Supporting material

Yulia Sosedova, Aurélie Rouvière, Thorsten Bartels-Rausch and Markus Ammann

### ESI Section I. Simulation of the temporal evolution of [NO<sub>2</sub>], [HONO], [ArNO<sub>2</sub>]<sub>s</sub> and [ArO•]<sub>s</sub>

For the well-mixed conditions in the CWFT and for the beginning of the reaction, assuming diffusion of NO<sub>2</sub> into the underlying film bulk is too slow in comparison to the surface reaction, the HONO formation rate  $R_{\text{HONO}}$  and the overall NO<sub>2</sub> loss  $L_{\text{NO}_2}$  (molecule m<sup>-2</sup> s<sup>-1</sup>) are approximated by the following mass balance equations:

$$R_{\text{HONO}} = k_{s1} \times N_s \times \theta_{\text{NO}_2} \times [\text{ArOH}]_s \quad \text{eq. 1}$$

$$L_{\text{NO}_2} = (k_{s1}[\text{ArOH}]_s + k_{s2}[\text{ArO}^\bullet]_s) \times N_s \times \theta_{\text{NO}_2} \quad \text{eq. 2}$$

$$L_{\text{NO}_2} = R_{\text{HONO}} + R_{\text{ArNO}_2} \quad \text{eq. 2a}$$

where  $k_{s1}$  and  $k_{s2}$  are the second-order rate constants (m<sup>2</sup> molecule<sup>-1</sup> s<sup>-1</sup>) for the surface reactions of absorbed NO<sub>2</sub> with the substituted phenol ArOH (gentisic or tannic acid) and the phenoxy radical ArO•, respectively,  $\theta_{\text{NO}_2}$  is the NO<sub>2</sub> molecules surface coverage,  $N_s$  is the number of adsorption sites on the surface (molecule m<sup>-2</sup>),  $[\text{ArOH}]_s$  and  $[\text{ArO}^\bullet]_s$  are the surface concentrations (molecule m<sup>-2</sup>) of the reactive parent molecules (or functional groups) and the phenoxy radical, respectively. The rate of nitro product formation,  $R_{\text{ArNO}_2}$  (molecule m<sup>-2</sup> s<sup>-1</sup>), has been introduced in eq. 2a in order to keep up with the mass balance. Similarly, the rate of the phenoxy intermediate ArO• formation,  $R_{\text{ArO}}$  (molecule m<sup>-2</sup> s<sup>-1</sup>), is expressed *via* the corresponding mass balance equation:

$$R_{\text{ArO}} = (k_{s1}[\text{ArOH}]_s - k_{s2}[\text{ArO}^\bullet]_s) \times N_s \times \theta_{\text{NO}_2} \quad \text{eq. 3}$$

$$R_{\text{ArO}} = R_{\text{HONO}} - R_{\text{ArNO}_2} \quad \text{eq. 3a}$$

We used eqs. 1–3 to simulate the temporal evolution of the gas-phase concentrations of NO<sub>2</sub> and HONO and the surface concentrations of the nitro product [ArNO<sub>2</sub>]<sub>s</sub> and of the phenoxy radical. The following initial concentrations were chosen to simulate NO<sub>2</sub> uptake on the TA surface in Fig. 1a: [NO<sub>2</sub>]<sub>0</sub> = 33 ppbv, [HONO]<sub>0</sub> = 0, [ArO•]<sub>s</sub> = 0. Note that during the simulations,  $\theta_{\text{NO}_2}$  was not affected by the reaction and we kept in mind that  $k_{s1}$ ,  $N_s$  and initial  $[\text{ArOH}]_s$  are inter-dependent parameters. We assumed that  $K_{\text{NO}_2}$  is similar for both coatings and fixed its value in our model to  $8.1 \times 10^{-19}$  m<sup>3</sup> molecule<sup>-1</sup>. In Fig. 1, the values  $k_{s1} = 3 \times 10^{-23}$  and  $k_{s2} = 6 \times 10^{-21}$  m<sup>2</sup> molecule<sup>-1</sup> s<sup>-1</sup>,  $N_s = 3.2 \times 10^{18}$  molecule m<sup>-2</sup> and  $[\text{ArOH}]_s = 3.2 \times 10^{17}$  molecule m<sup>-2</sup> were used in model simulations (red lines) to match both the initially observed HONO formation and NO<sub>2</sub> loss under dark conditions, and the first-order decay kinetics observed for the HONO formation rate, with a first-order rate constant of  $6.3 \times 10^{-5}$  s<sup>-1</sup>. The latter is driven by the consumption of the reactive molecules (ArOH) in the coating. Similar temporal evolution of HONO formation on a TA coating with MB addition and on GA coatings with and without MB addition was simulated.

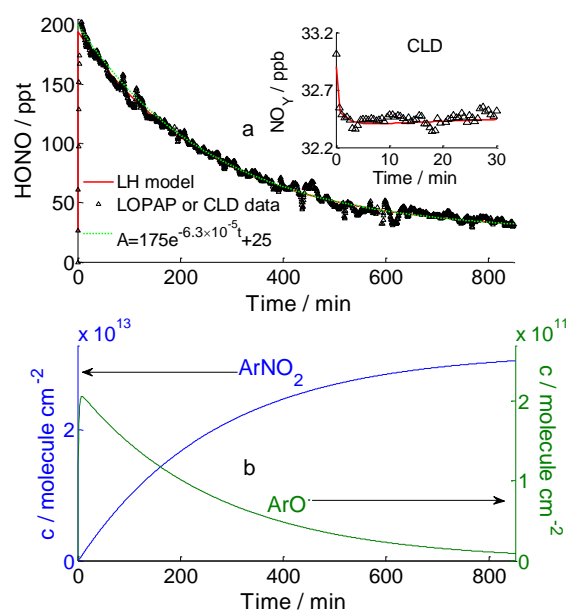

**Fig. 1** (a) Typical experiment on HONO formation upon  $\text{NO}_2$  (33 ppbv) uptake on a TA coating in the dark: LOPAP and CLD (inset) data are shown with triangles and simulated with the LH model described in the text (red lines). The dashed green line represents a single exponential decay. (b) Simulated surface concentrations of the  $\text{ArNO}_2$  product and  $\text{ArO}^*$  intermediate for a gas residence time in the tube of 0.4 s and with parameters as given in text.

The values of  $N_s$  used to simulate  $\text{NO}_2$  uptake and HONO formation on GA and TA coatings, as well as on solid anthrarobin [Arens et al., 2002] exceeded the estimated surface density of aromatic rings that was proposed to be a rough approximation for  $N_s$ , since aromatic rings could serve as adsorption sites for  $\text{NO}_2$  via formation of a charge transfer complex.[Li et al., 1998] The value  $N_s = 3.2 \times 10^{18} \text{ molecules m}^{-2}$  required to bring the data in agreement with the simulation (Fig. 1) exceeds the predicted upper limit of about  $1.5 \times 10^{18} \text{ m}^{-2}$ . This might be a consequence of surface roughness as already proposed for the solid anthrarobin on a comparable substrate [Arens et al., 2002]. Visual inspection of the films revealed that those made of GA did not look smooth, with sometimes irregular precipitates, and those made of TA, though they looked rather smooth over small scales, tended to gain glassy appearance and cracks formed easily during the drying procedure. Thus the effective surface area of both types of coatings could be higher than the geometric inner surface of the CWFT, leading to higher than expected concentration of adsorption sites for  $\text{NO}_2$  and thus also normalized rates of HONO formation.

## ESI Section II. Calculation of the net uptake coefficient for the dark reaction of $\text{NO}_2$

For comparison with other studies, it is useful to calculate the uptake coefficient  $\gamma_{\text{NO}_2}$ , a parameter being usually referred to in the atmospheric chemistry literature, which represents the loss rate of gaseous  $\text{NO}_2$  species normalized to the gas-kinetic collision rate with the surface:

$$\gamma_{\text{NO}_2} = \frac{4k_{\text{loss}}}{\omega \times [S/V]} \quad \text{eq. 4}$$

where  $\omega$  is the mean thermal velocity of  $\text{NO}_2$  molecules ( $369 \text{ m s}^{-1}$  at 296 K),  $[S/V]$  is the surface to volume ratio of the coated-wall flow tube ( $\text{m}^{-1}$ ) and  $k_{\text{loss}}$  is the pseudo-first rate constant ( $\text{s}^{-1}$ ) for the  $\text{NO}_2$  loss from the gas phase and can be obtained from the experiment for the beginning of the reaction (after the reaction time  $\Delta t$  (s)) and  $K_{\text{NO}_2}[\text{NO}_2] \ll 1$ :

$$k_{\text{loss}} = -\ln \frac{[\text{NO}_2]}{[\text{NO}_2]_0} \times \frac{1}{\Delta t} \quad \text{eq. 5}$$

Thus, the initial  $\text{NO}_2$  uptake coefficient in the dark estimated from Fig. 1 is  $\gamma_{\text{NO}_2} = 5 \times 10^{-7}$  on the TA coating and  $7 \times 10^{-7}$  on the GA coating. Though thin solid films of pure catechol were nonreactive with  $\text{NO}_2$  under dark and low RH conditions [George et al., 2005; Kwamena et al., 2007], an enhanced  $\text{NO}_2$  uptake coefficient of  $7 \times 10^{-6}$  on catechol adsorbed on a NaCl substrate at a relative humidity of 30 % was reported recently, leading to the formation of nitro-compounds detected by DRIFTS [Woodill and Hinrichs, 2010].

### ESI Section III. Calculation of the reactive uptake coefficient for the dark $\text{NO}_2$ to HONO conversion

In order to compare our results with previous studies, which were focused only on the formation of the gas-phase product, HONO, we also calculated the reaction probability that a gas kinetic collision of an  $\text{NO}_2$  molecule leads to the formation of a HONO molecule,  $\gamma_{\text{rxn}}$ , by eq. 4 using  $k_{\text{prod}}$  instead of  $k_{\text{loss}}$  for the beginning of the reaction:

$$k_{\text{prod}} = -\ln \frac{[\text{NO}_2]_0 - \Delta[\text{HONO}]}{[\text{NO}_2]_0} \times \frac{1}{\Delta t} \quad \text{eq. 6}$$

The resulting  $\gamma_{\text{rxn}}$  was  $\sim 3 \times 10^{-7}$  for the TA and GA coating and 7 – 8 times higher for the TA and GA coatings with 1 wt.% MB addition ( $2 \times 10^{-6}$  and  $2.4 \times 10^{-6}$ , respectively) and decreased with increasing  $\text{NO}_2$  concentration. The range of  $\gamma_{\text{rxn}}$  obtained is similar to the reported  $\text{NO}_2$  dark uptake coefficients of  $7 \times 10^{-7} - 2 \times 10^{-6}$  on anthrarobin films<sup>15</sup> and higher than on humic acid surfaces with an upper limit  $< 10^{-7}$  [Stemmler et al., 2007]. Lower reactivity of the humic acid coatings in the dark is likely due to the presence of some electron withdrawing groups.

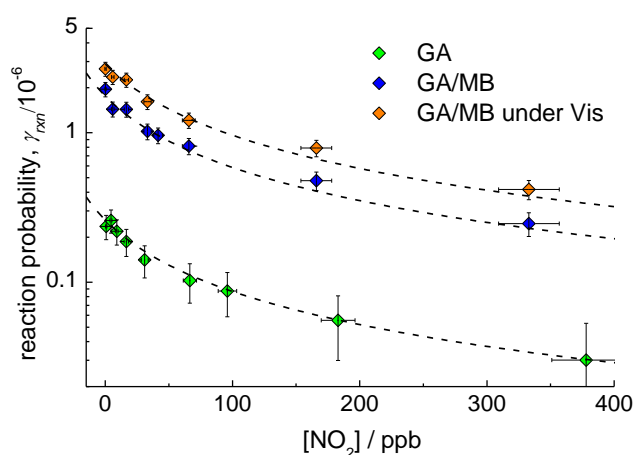

**Fig. 2** Reaction probability of the  $\text{NO}_2$  uptake leading to HONO formation on GA coating ( $0.5 \text{ mg cm}^{-2}$  GA,  $0.05 \text{ mg cm}^{-2}$  citric acid) without (green diamonds) and with 1 wt.% MB addition (blue diamonds) in the dark as a function of  $\text{NO}_2$  concentration, and on GA coating with 1% MB addition under 7 Vis lamps irradiation (orange diamonds). For model description (dashed lines) see text.

### ESI Section IV. Dependence of the reactive uptake coefficient for $\text{NO}_2$ to HONO conversion on the initial $[\text{NO}_2]$

Fig. 2 demonstrates how  $\gamma_{\text{rxn}}$  for  $\text{NO}_2$  conversion to HONO in the dark and under irradiation decreases with increasing the initial  $\text{NO}_2$  concentration,  $[\text{NO}_2]$ . Eq. 7 describes this dependence for the dark  $\text{NO}_2$  uptake within the Langmuir-Hinshelwood model, with  $k_{\text{prod}} = 8.7 \times 10^{-2}$  and  $1.2 \times 10^{-2} \text{ s}^{-1}$  for HONO formation on the GA coating with and without addition of 1 wt.% MB, respectively and the adsorption equilibrium constant of  $K_{\text{NO}_2} = 8.1 \times 10^{-19} \text{ m}^3 \text{ molecule}^{-1}$ .

$$\gamma_{\text{rxn}} = \frac{2r}{\omega} \times \frac{k_{\text{prod}}}{1 + K_{\text{NO}_2} [\text{NO}_2]} \quad \text{eq. 7}$$

NO<sub>2</sub> reactive uptake on GA coating with 1 wt.% addition of MB under visible irradiation as a function of [NO<sub>2</sub>] is described in Fig. 2 as a sum of the dark and photoenhanced uptake, using model eq. 8 with parameters  $k_{\text{eff}} = 5.2 \times 10^{-2} \text{ s}^{-1}$  and  $k_{\text{max}} = 0.37 \text{ ppbv s}^{-1}$  per lamp or  $4.5 \times 10^{-21} \text{ ppbv s}^{-1}$  per photon  $\text{s}^{-1} \text{ m}^2$ .

$$\gamma_{\text{rxn}} = \frac{2r}{\omega} \times \left\{ \frac{k_{\text{prod}}}{1 + K_{\text{NO}_2} [\text{NO}_2]} + \frac{k_{\text{eff}}}{1 + \frac{k_{\text{eff}} \times [\text{NO}_2]}{k_{\text{max}} \times [F]}} \right\} \quad \text{eq. 8}$$

Arens, F., L. Gutzwiller, H. W. Gäggeler and M. Ammann. The reaction of NO<sub>2</sub> with solid anthrarobin (1,2,10-trihydroxyanthracene). *Physical Chemistry Chemical Physics* **4**(15): 3684-3690, 2002.

George, C., R. S. Strekowski, J. Kleffmann, K. Stemmler and M. Ammann. Photoenhanced uptake of gaseous NO<sub>2</sub> on solid-organic compounds: a photochemical source of HONO? *Faraday Discussions* **130**: 195-210, 2005.

Kwamena, N. O. A., M. G. Staikova, D. J. Donaldson, I. J. George and J. P. D. Abbatt. Role of the aerosol substrate in the heterogeneous ozonation reactions of surface-bound PAHs. *Journal of Physical Chemistry A* **111**(43): 11050-11058, 2007.

Li, X. Y., S. Y. Shen, Q. F. Zhou, H. J. Xu, D. P. Jiang and A. D. Lu. The gas response behavior of spin-coated phthalocyanine films to NO<sub>2</sub>. *Thin Solid Films* **324**(1-2): 274-276, 1998.

Stemmler, K., M. Ndour, Y. Elshorbany, J. Kleffmann, B. D'Anna, C. George, B. Bohn and M. Ammann. Light induced conversion of nitrogen dioxide into nitrous acid on submicron humic acid aerosol. *Atmospheric Chemistry and Physics* **7**: 4237-4248, 2007.

Woodill, L. A. and R. Z. Hinrichs. Heterogeneous reactions of surface-adsorbed catechol with nitrogen dioxide: substrate effects for tropospheric aerosol surrogates. *Physical Chemistry Chemical Physics* **12**(36): 10766-10774, 2010.
